# Supplementary material for: CFD-accelerated bioreactor optimization: reducing the hydrodynamic parameter space
Source: Royal Society of Chemistry journal article supplement (doi:10.1039/d1ew00666e), 2022-01-01
Supplement: d1ew00666e1.pdf [file d1ew00666e1.pdf]

## Supplementary Information

# CFD-accelerated bioreactor optimization: Reducing the hydrodynamic parameter space

Yinuo Yao, Oliver B. Fringer, Craig S. Criddle

### 1 Calculation of total power requirement

In the design of the AFBR, there are many sources of pressure loss such as pipe fittings, the particles, diffusers and other frictional losses. In this appendix, we consider three major sources of pressure loss, namely fluidization, hydrostatic pressure due to elevation and friction loss due to the pipes. The total power requirement  $P_{loss}$  is defined as

$$P_{loss} = \rho_f g \left( h_{GAC} + f \frac{L}{D_{pipe}} \frac{u_{pipe}^2}{2g} + h_{static} \right), \quad (1)$$

where  $h_{GAC}$  is the head loss due to fluidization of the GAC particles,  $D_{pipe}$  is the length of the recirculation pipe,  $u_{pipe}$  is the flow speed in the recirculation pipe,  $\rho_f$  is the density of water,  $g$  is the gravitational acceleration,  $h_{static} = H_f$  is the elevation difference and  $f$  is the friction factor.

To calculate  $h_{GAC}$ , we apply Ergun's relationship

$$u_{mf} = \frac{gd_p^2(\rho_p/\rho_f - 1)(1 - \phi_{mf})^3}{150\nu_f \phi_{mf}}, \quad (2)$$

where  $\phi_{mf} = 0.52$  is the volume fraction of close-packed particles and

$$h_{GAC} = \frac{150\nu_f H_0}{gd_p^2} \frac{\phi_{mf}^2}{(1 - \phi_{mf})^3} u_{mf} + \frac{1.75H_0}{gd_p} \frac{\phi_{mf}}{(1 - \phi_{mf})^3} u_{mf}^2, \quad (3)$$

where  $H_0 = H_f \phi / \phi_{mf}$  is the height of a close-packed bed and  $\phi$  is the volume fraction of the fluidized bed given an upflow velocity  $u_0$ . The volume fraction can be estimated with the power law relationship

$$\phi = 1 - \left( \frac{u_0}{kw_t} \right)^{1/n}, \quad (4)$$

where  $k$  is a constant in the range 0.7 – 0.9,  $w_t$  is the settling velocity of a single particle in the domain of interest and  $n$  is the expansion index that can be estimated from the relationship

$$n = \frac{5.1 + 0.27Re_t^{0.9}}{1 + 0.1Re_t^{0.9}}, \quad (5)$$

19 where  $Re_t = w_t d_p / \nu_f$  is the terminal Reynolds number. The friction factor can be calculated with the  
20 modified Colebrook White equation

$$f = \frac{0.25}{\log\left(\frac{\zeta}{3.7D_{pipe}} + \frac{5.74}{Re_{pipe}^{0.9}}\right)}, \quad (6)$$

21 where  $\zeta = 0.0015$  is the typical roughness coefficient of a PVC pipe and  $Re_{pipe} = u_{pipe} D_{pipe} / \nu_f$  is the  
22 pipe Reynolds number based on  $u_{pipe} = 4Q_r / (\pi D_{pipe}^2)$ , where  $Q_r = u_0 A$  is the recirculation flow rate  
23 and  $A$  is the cross sectional area of the recirculation flow pipeline. We assume the reactor dimensions  
24 such that  $L = 4.3$  m,  $H_f = 2$  m and  $A = 1.4$  m<sup>2</sup>. Different  $Ar$  are achieved by using a particle diameter  
25 of  $d_p = 2$  mm and particle densities of  $\rho_p = 1300, 2600$  and  $4000$  kg m<sup>-3</sup>.
